# Supplementary material
Source: PubMed Central journal article supplement (PMC4441569)

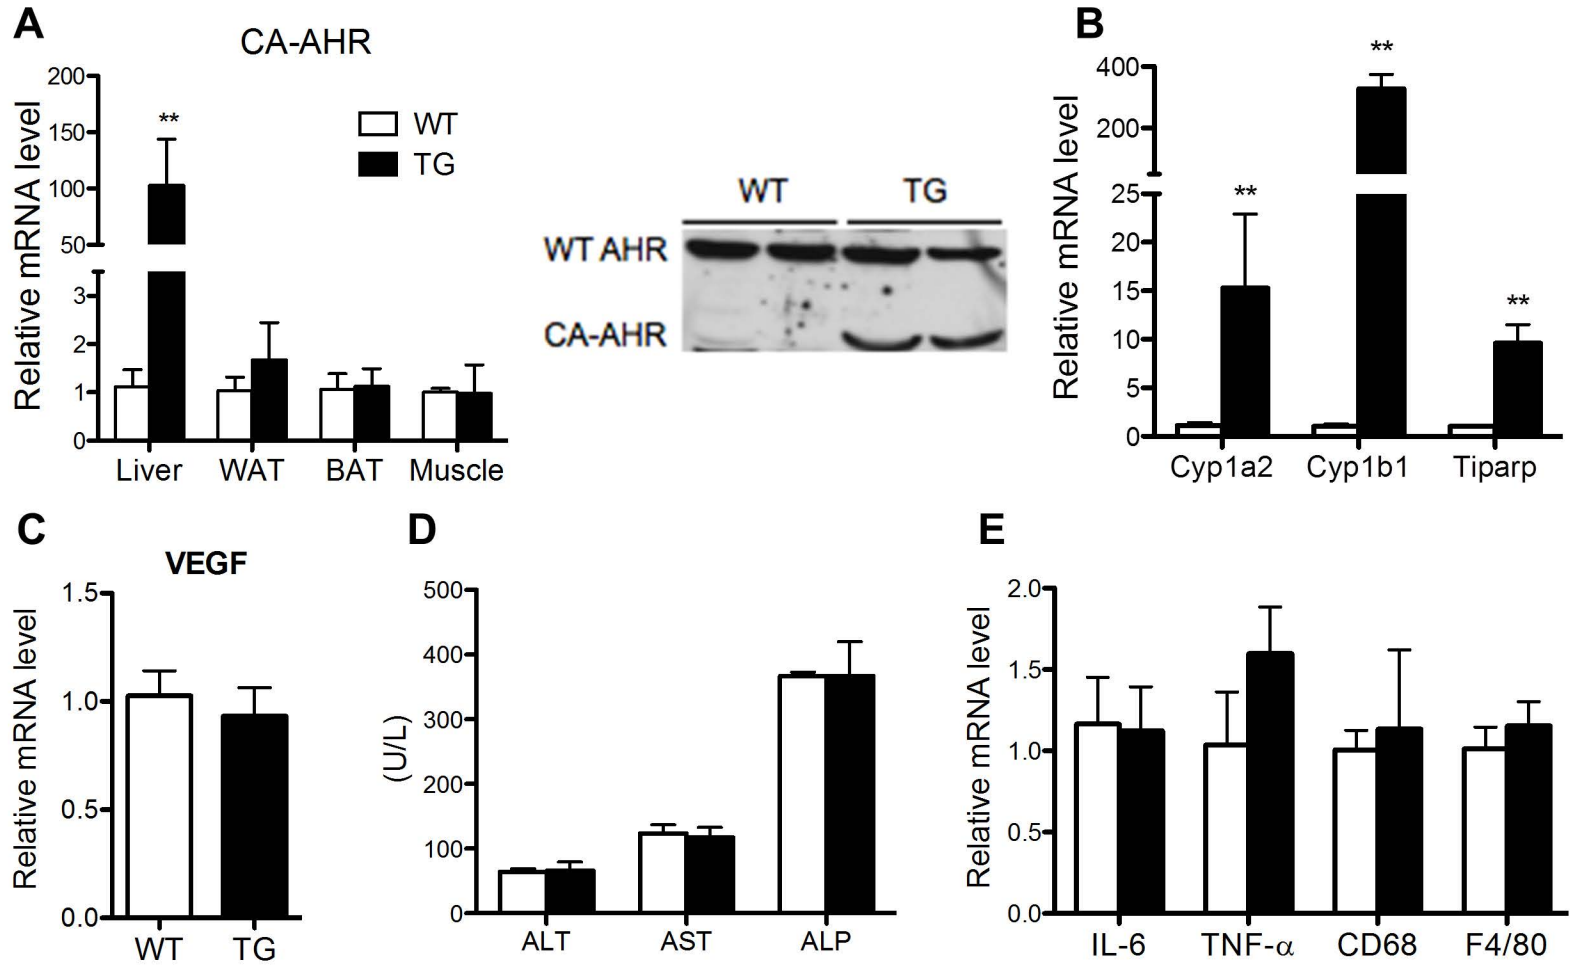

Chow 6 weeks

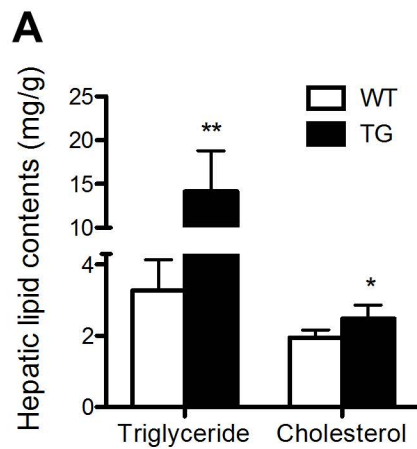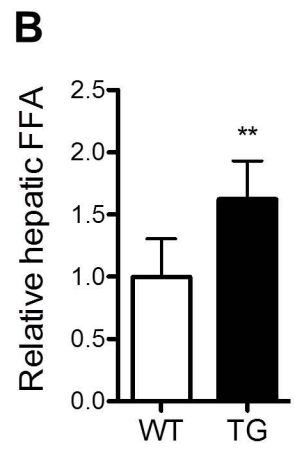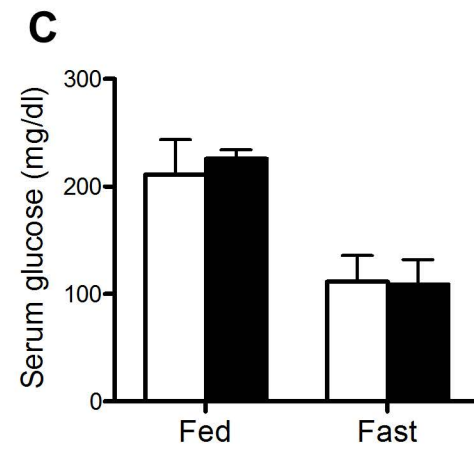

Chow 20 weeks

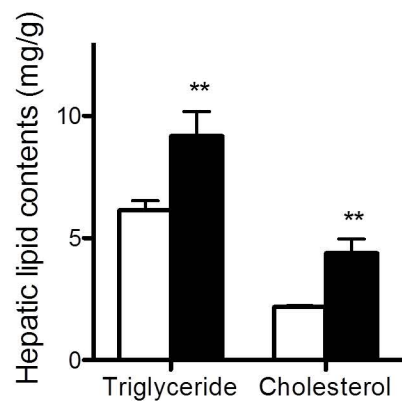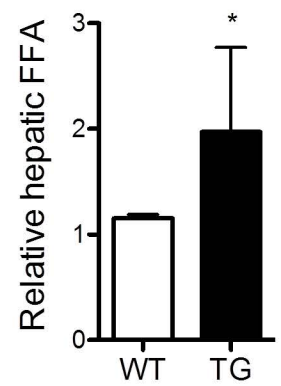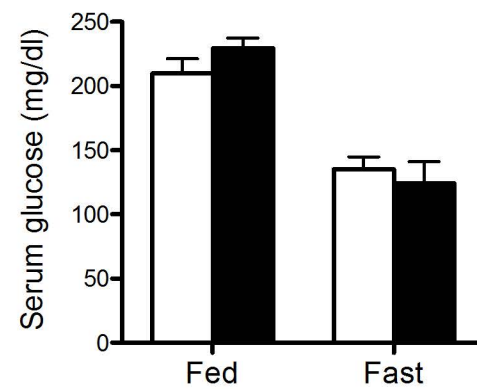

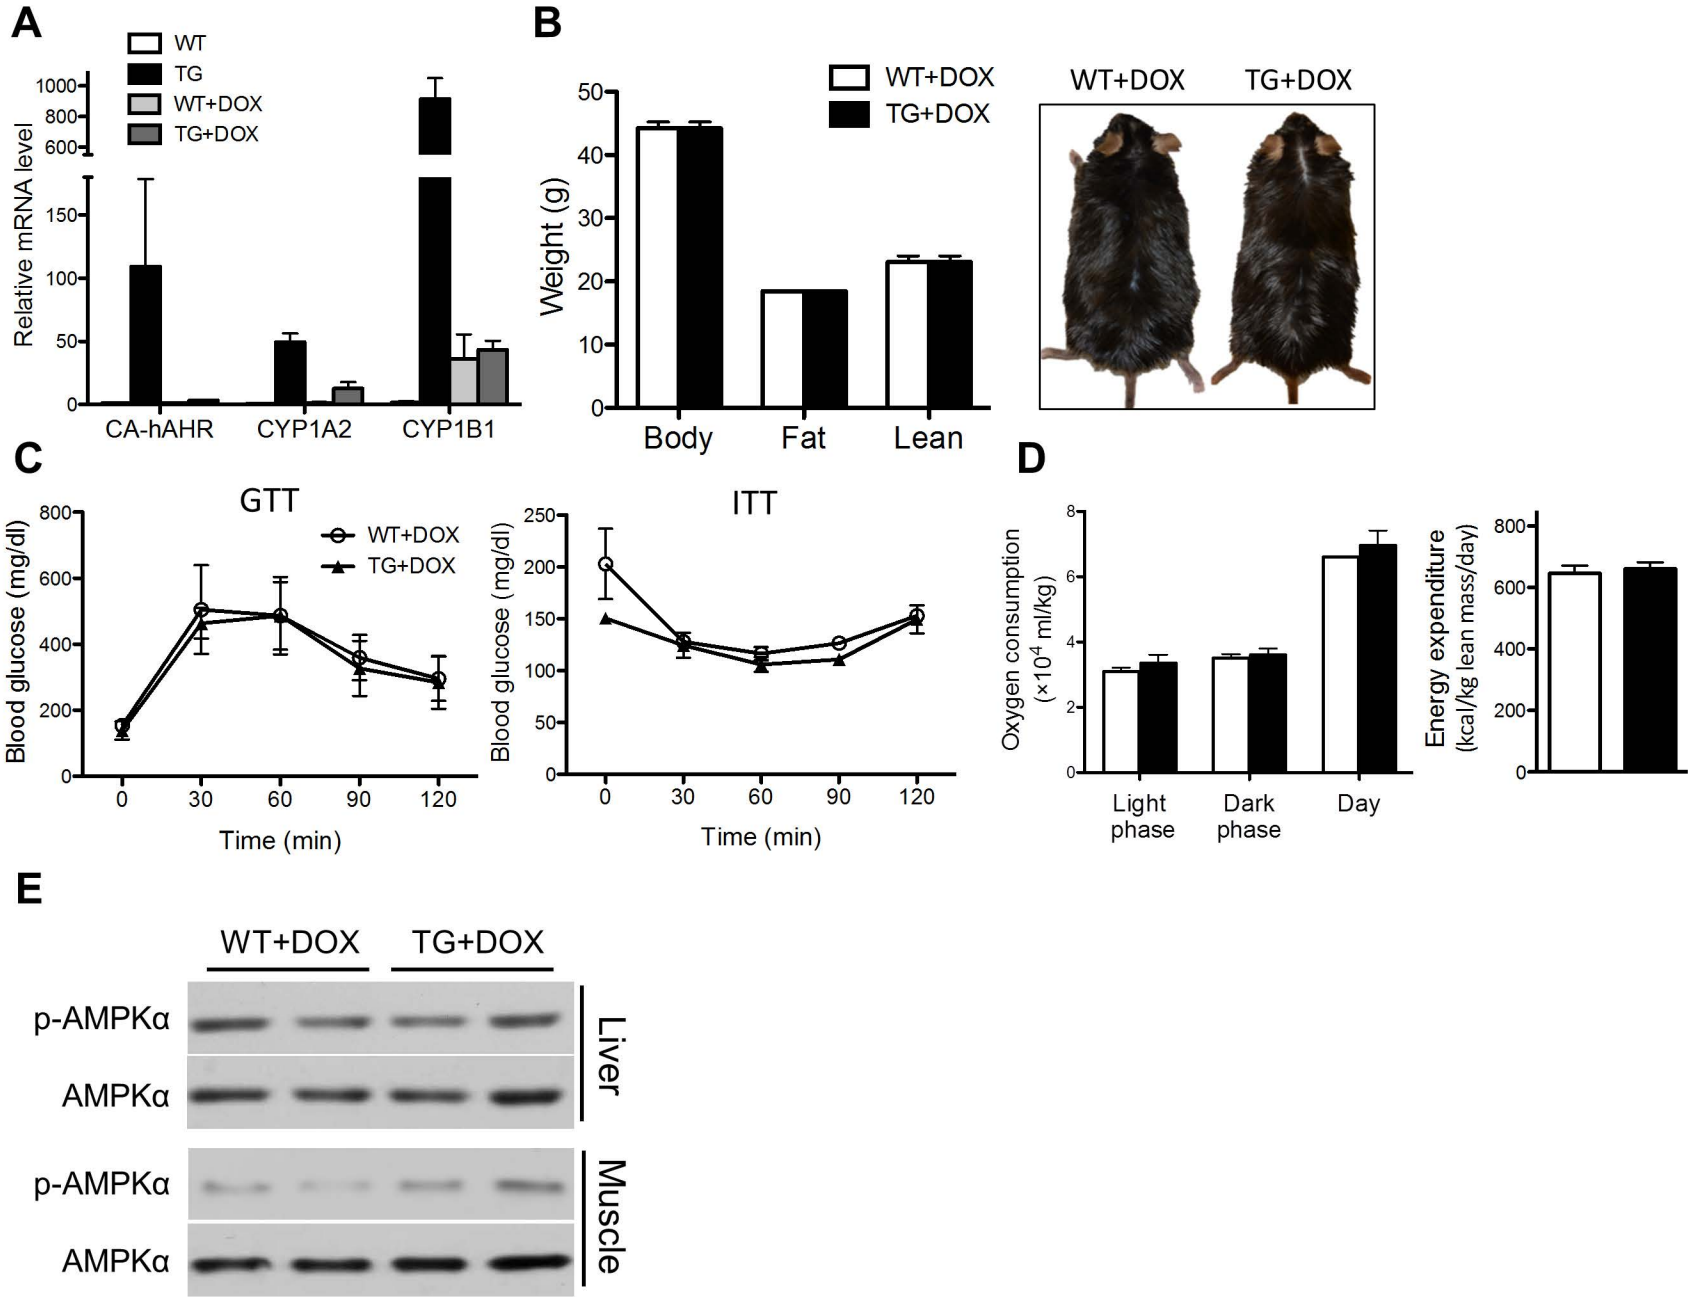

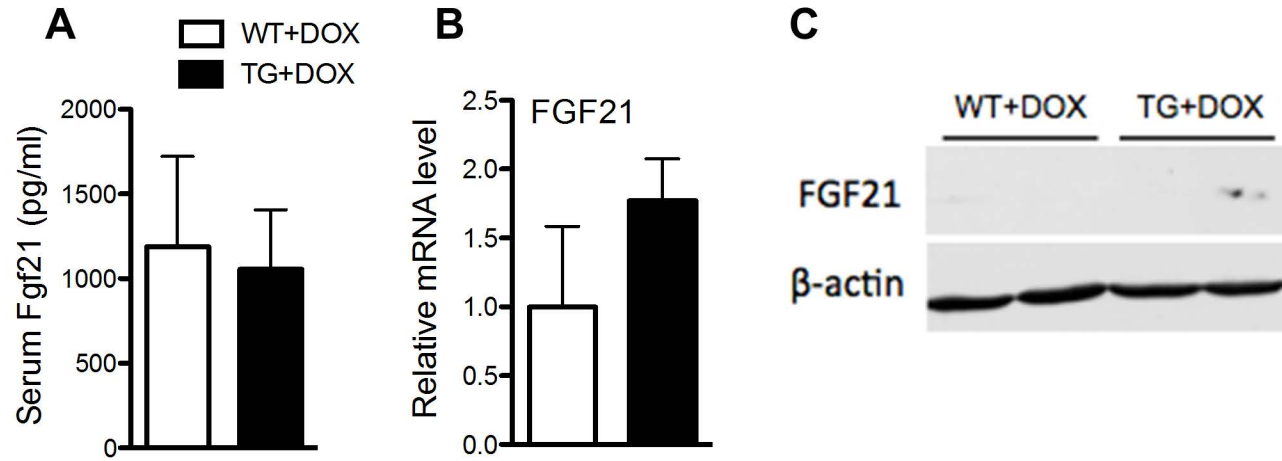

Supplement: NIHMS665061-supplement-Supp_FigureS1-S4.pdf [file NIHMS665061-supplement-Supp_FigureS1-S4.pdf]
